# Supplementary material
Source: HighWire-hosted journal article supplement (http://jnis.bmj.com/highwire/filestream/165200/field_highwire_adjunct_files/2/neurintsurg-2020-016724supp003_data_supplement.pdf)
Supplement: neurintsurg-2020-016724supp003_data_supplement.pdf [file neurintsurg-2020-016724supp003_data_supplement.pdf]

## Supplementary Material 2

This supplementary material presents methods and results of analysis of the correlations between four haemodynamic parameters and clinical treatment outcomes through use of a binary logistic regression model.

### Method:

A binary logistic regression model was constructed to evaluate the relationship between flow-diversion outcome (*i.e.* aneurysm occlusion) and each of the four haemodynamic parameters – IR, EL, AAV, and WSS. Calibration of the model (*i.e.* statistical precision) was assessed by the Hosmer-Lemeshow goodness-of-fit test, with  $p > 0.05$  being an indication of that the model has a high predictive ability (*i.e.* no statistical difference between observed and expected values). All analyses were performed using MedCalc version 19.1 (Ostend, Belgium).

### Results:

**Figure S2-1** shows the logistic regression curves corresponding to the four haemodynamic parameters investigated, and **Table S2-1** presents the statistical results of each analysis. Logistic regression analyses revealed that IR (OR: 0.9468, 95% CI: 0.8976 to 0.9987,  $p = 0.0208$ ) and EL (OR: 0.9389, 95% CI: 0.8766 to 1.0057,  $p = 0.0171$ ) better predict aneurysm occlusion, in contrast to AAV ( $p = 0.2628$ ) and WSS ( $p = 0.8075$ ), which is in agreement with the findings of our meta-analysis.

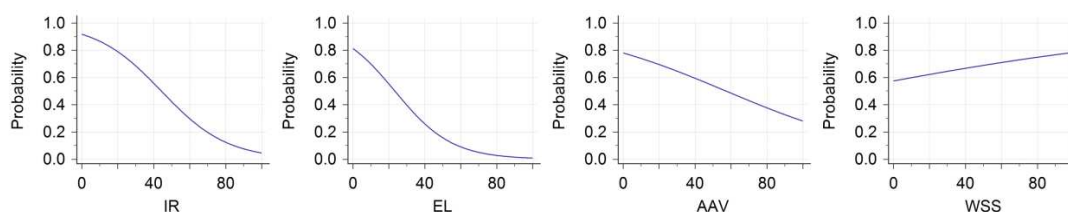

**Figure S2-1.** Binary logistic regression curves of IR, EL, AAV, and WSS in relation to the clinical outcomes after flow-diversion intervention. IR: inflow rate; EL: energy loss; AAV: intra-aneurysmal average velocity; and WSS: wall shear stress.

**Table S2-1.** Statistical results of the logistic regression of four haemodynamic parameters.

| Parameters | Coeff.  | SE     | Wald   | $p$ value       | Hosmer & Lemeshow test |                 | OR     | 95% CI of OR     |
|------------|---------|--------|--------|-----------------|------------------------|-----------------|--------|------------------|
|            |         |        |        |                 | $\chi^2$               | $p$ value       |        |                  |
| IR         | -0.0546 | 0.0272 | 4.0292 | <b>0.0208</b> † | 6.3114                 | 0.5039          | 0.9468 | 0.8976 to 0.9987 |
| EL         | -0.0630 | 0.0350 | 3.2324 | <b>0.0171</b> † | 7.6540                 | 0.3641          | 0.9389 | 0.8766 to 1.0057 |
| AAV        | -0.0221 | 0.0204 | 1.1749 | 0.2628          | 15.7943                | <b>0.0454</b> † | 0.9781 | 0.9397 to 1.0180 |
| WSS        | 0.0099  | 0.0407 | 0.0592 | 0.8075          | 7.3651                 | 0.1178          | 1.0100 | 0.9325 to 1.0939 |

IR: inflow rate; EL: energy loss; AAV: intra-aneurysmal average velocity; WSS: wall shear stress; Coeff.: coefficient; SE: standard error; OR: odds ratio; and CI: confidence interval.

† suggestive of statistical significance ( $p < 0.05$ ).
